# Supplementary material for: Access to New Cytotoxic Triterpene and Steroidal Acid-TEMPO Conjugates by Ugi Multicomponent-Reactions
Source: MDPI journal article supplement (doi:10.3390/ijms22137125), 2021-07-01
Supplement: s1 [file s1]

## Supplementary Materials for

### Access to new cytotoxic triterpene and steroidal acid-TEMPO conjugates by Ugi multicomponent-reactions

**Table S1.** Numerical values of EPR characteristics ( $A_{\text{iso}}$  and  $\tau_c$  (ns)) for the nitroxide conjugated compounds, obtained by simulations.

| Compound | $\tau_c(\text{ns})$ | $A_{\text{iso}}(\text{MHz})$ |
|----------|---------------------|------------------------------|
| 6        | 1,10                | 45,33                        |
| 7        | 1,39                | 45,33                        |
| 8        | 2,00                | 47,33                        |
| 9        | 2,52                | 47,33                        |
| 10       | 2,00                | 47,67                        |
| 11       | 2,28                | 47,67                        |
| 12       | 2,44                | 45,33                        |
| 14       | 1,30                | 45,33                        |
| 16       | 1,93                | 45,33                        |
| 17       | 2,07                | 45,33                        |
| 18       | 2,68                | 45,33                        |

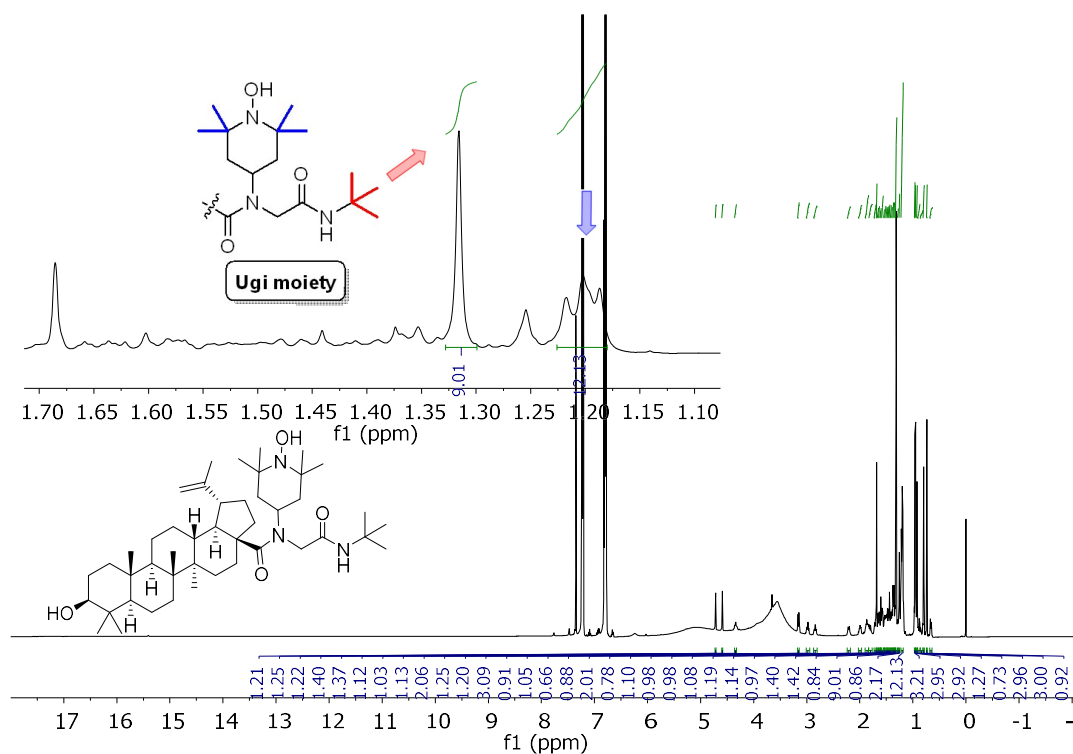

**Figure S2.**  $^1\text{H}$  NMR (600 MHz,  $\text{CDCl}_3$ ) spectrum of compound **6**.

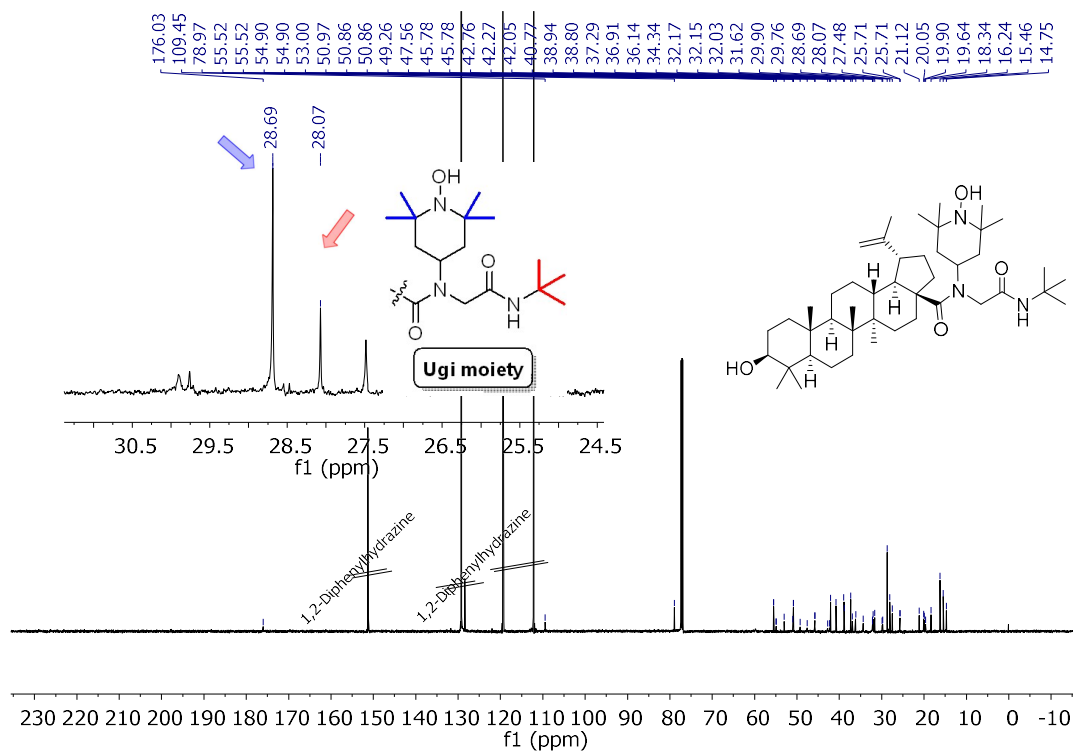

**Figure S3.**  $^{13}\text{C}$  NMR (151 MHz,  $\text{CDCl}_3$ ) spectrum of compound **6**.

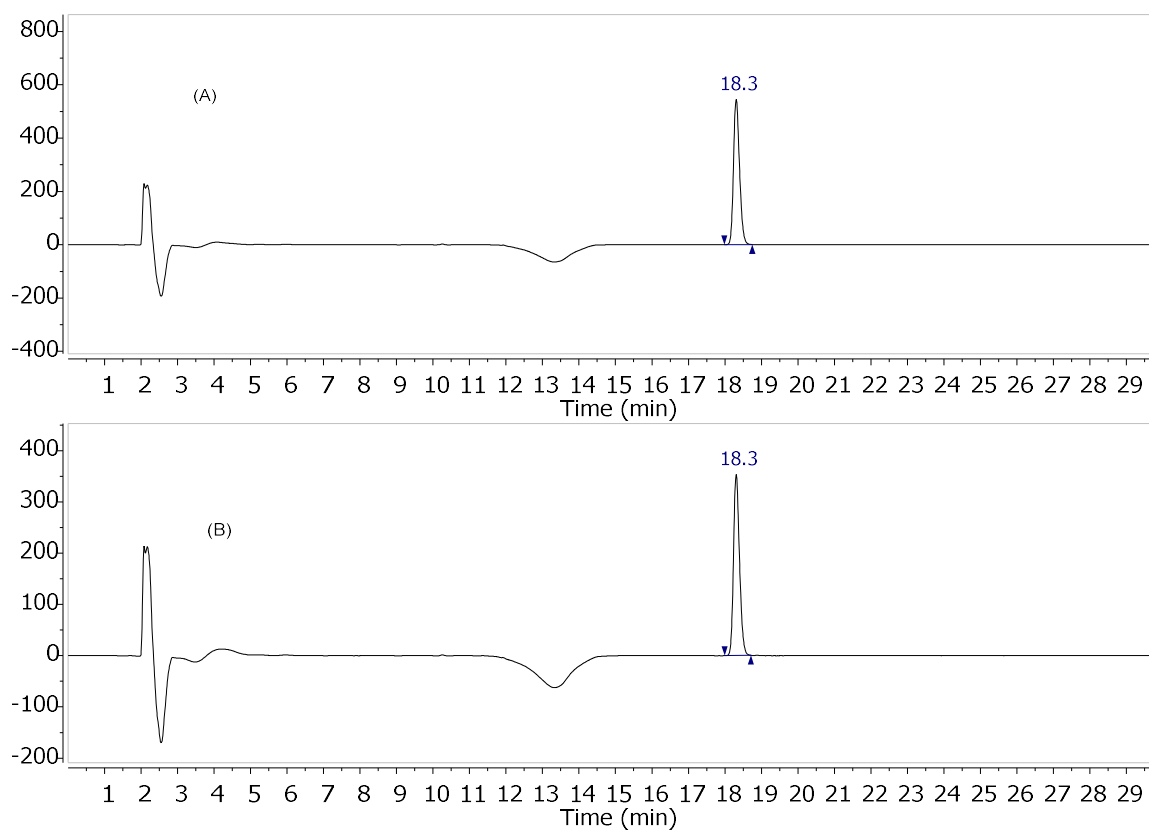

**Figure S4.** RP-HPLC chromatogram of compound **6** a) 210 nm, b) 215 nm.

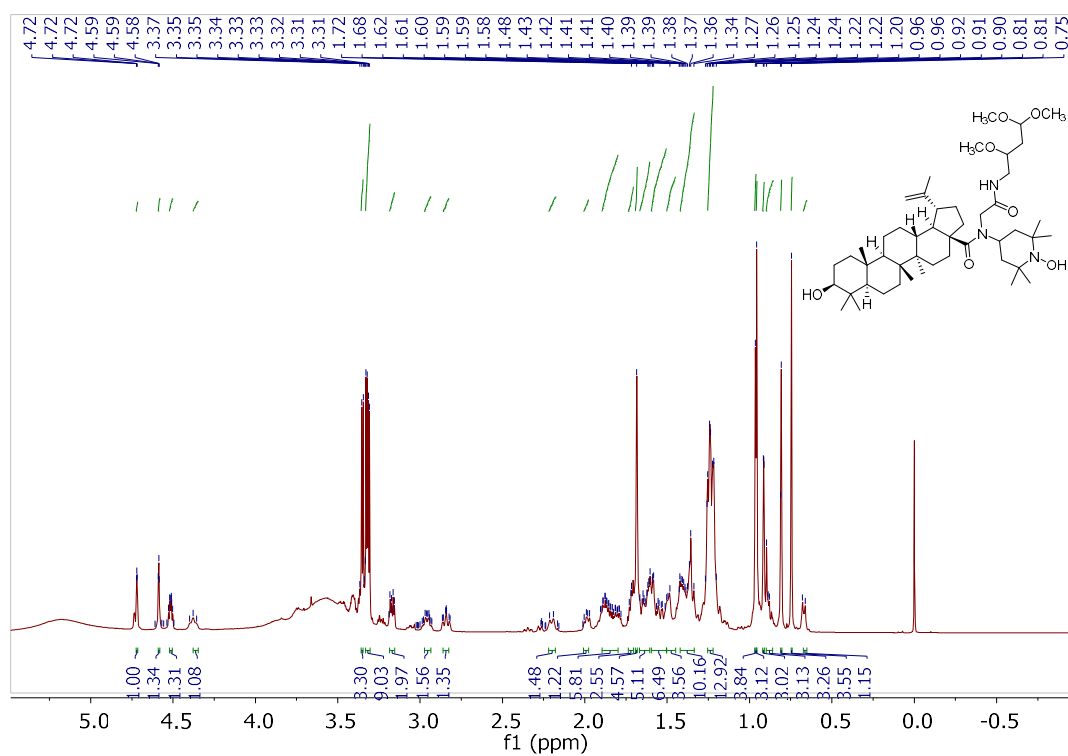

**Figure S5.**  $^1\text{H}$  NMR (600 MHz,  $\text{CDCl}_3$ ) spectrum of compound 7.

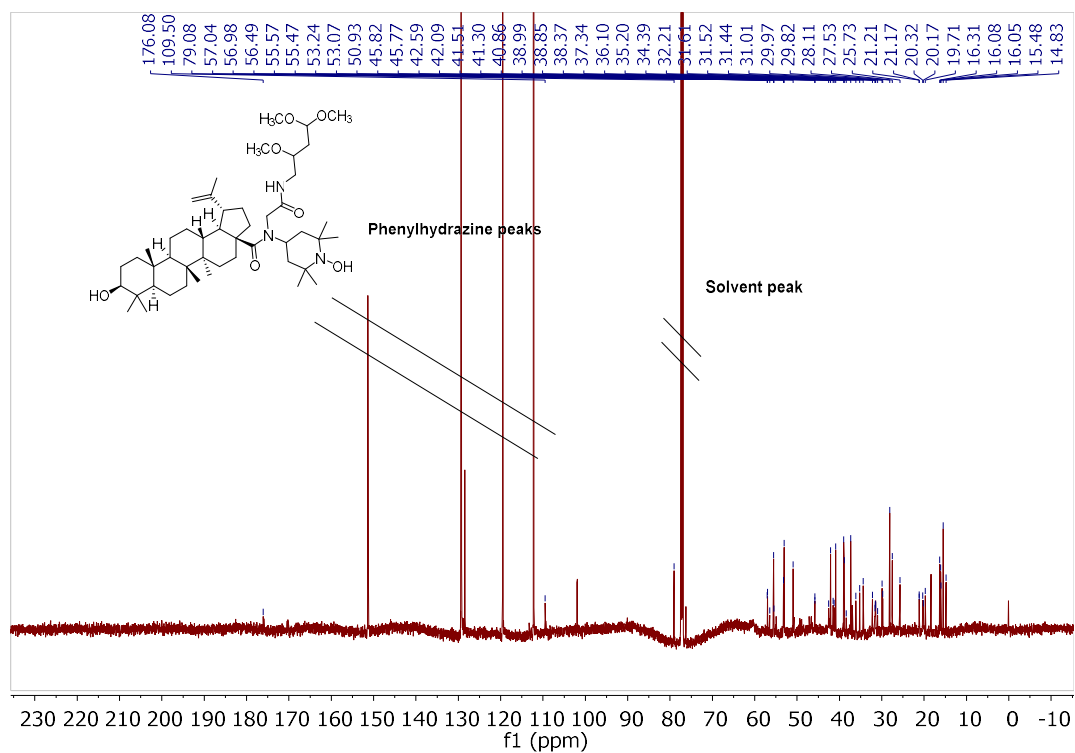

**Figure S6.**  $^{13}\text{C}$  NMR (151 MHz,  $\text{CDCl}_3$ ) spectrum of compound 7.

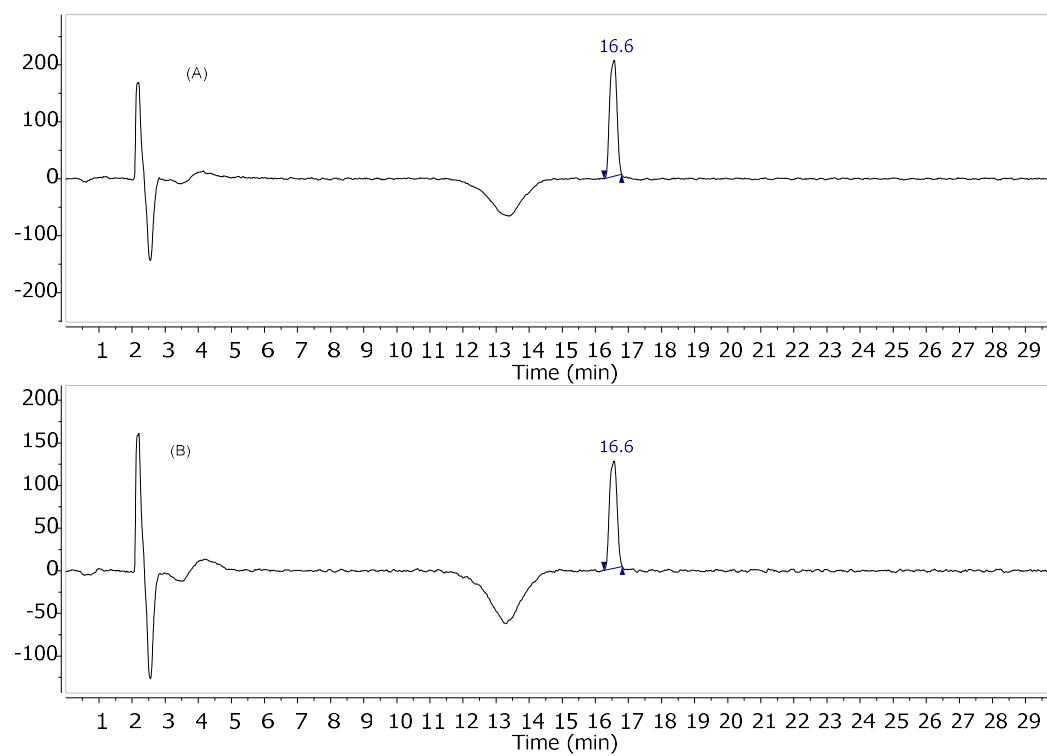

**Figure S7.** RP-HPLC chromatogram of compound 7 a) 210 nm, b) 215 nm.

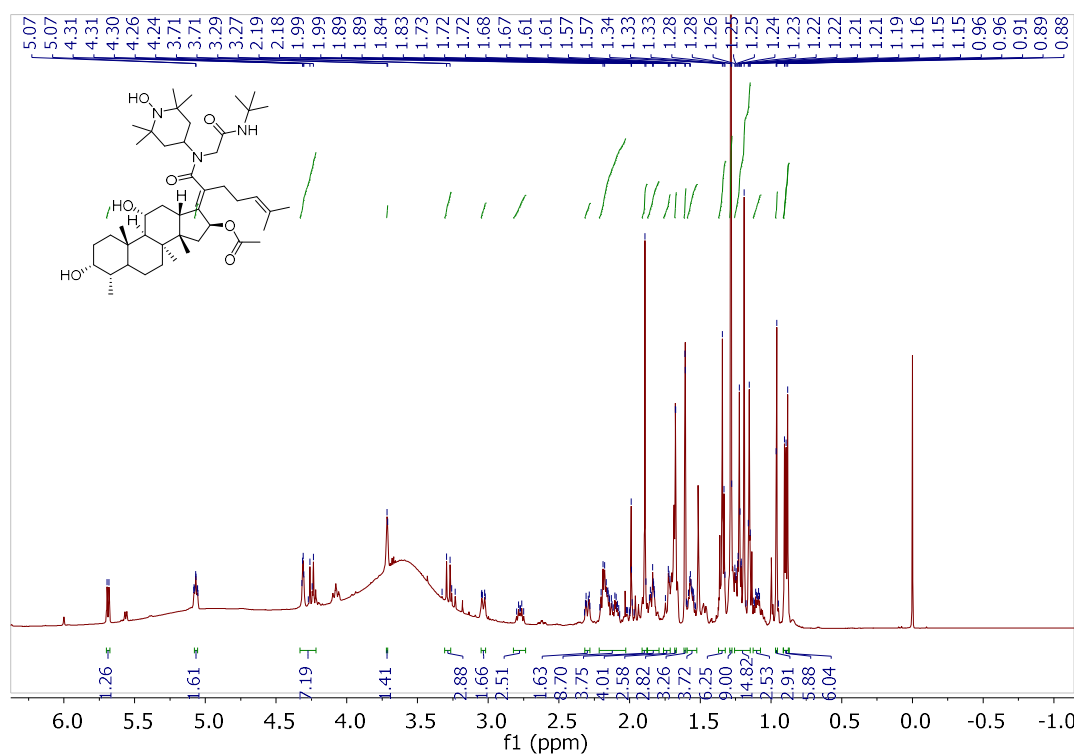

**Figure S8.**  $^1\text{H}$  NMR (600 MHz,  $\text{CDCl}_3$ ) spectrum of compound **8**.

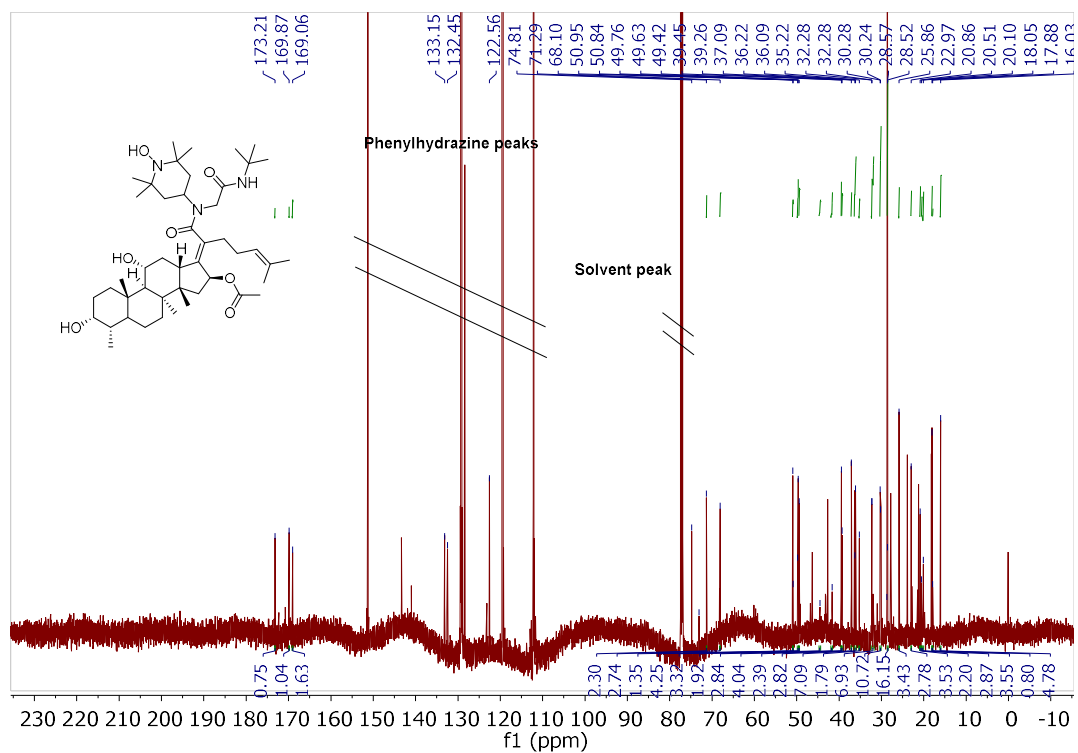

**Figure S9.**  $^{13}\text{C}$  NMR (151 MHz,  $\text{CDCl}_3$ ) spectrum of compound **8**.

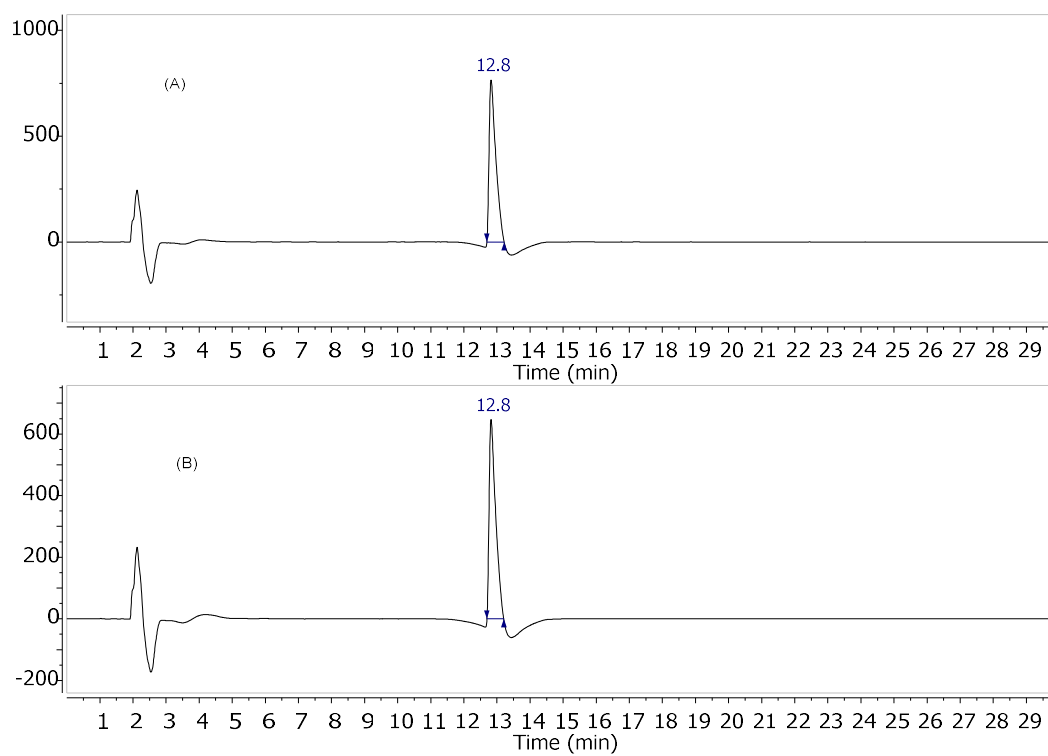

**Figure S10.** RP-HPLC chromatogram of compound **8** a) 210 nm, b) 215 nm.

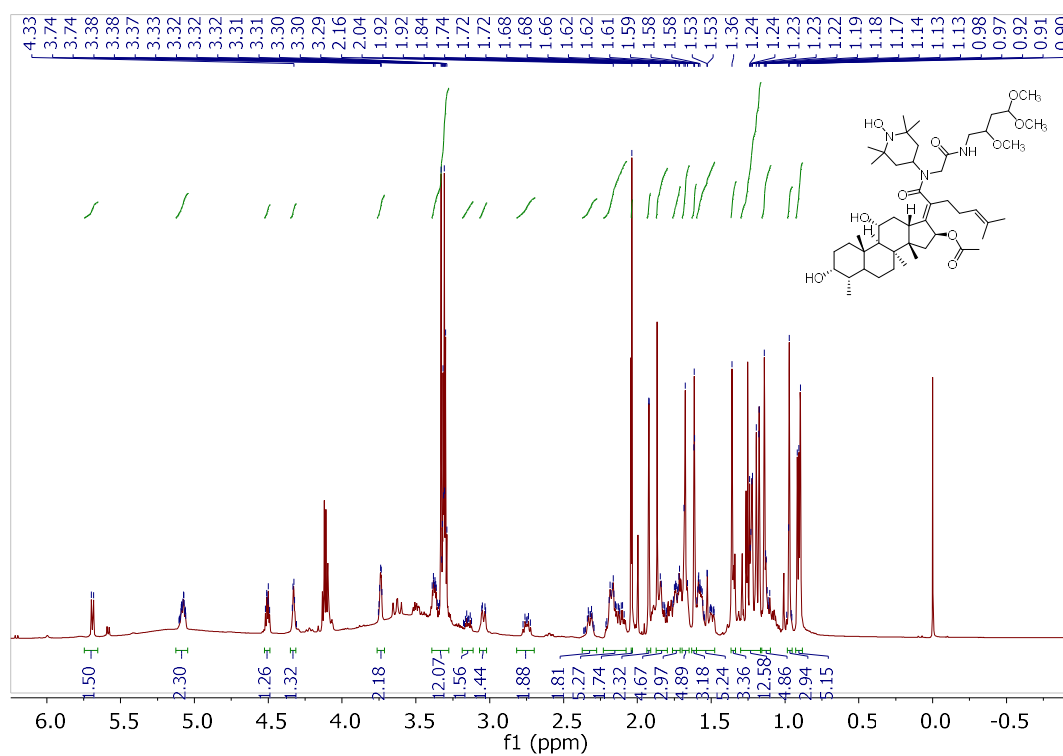

**Figure S11.**  $^1\text{H}$  NMR (600 MHz,  $\text{CDCl}_3$ ) spectrum of compound **9**.

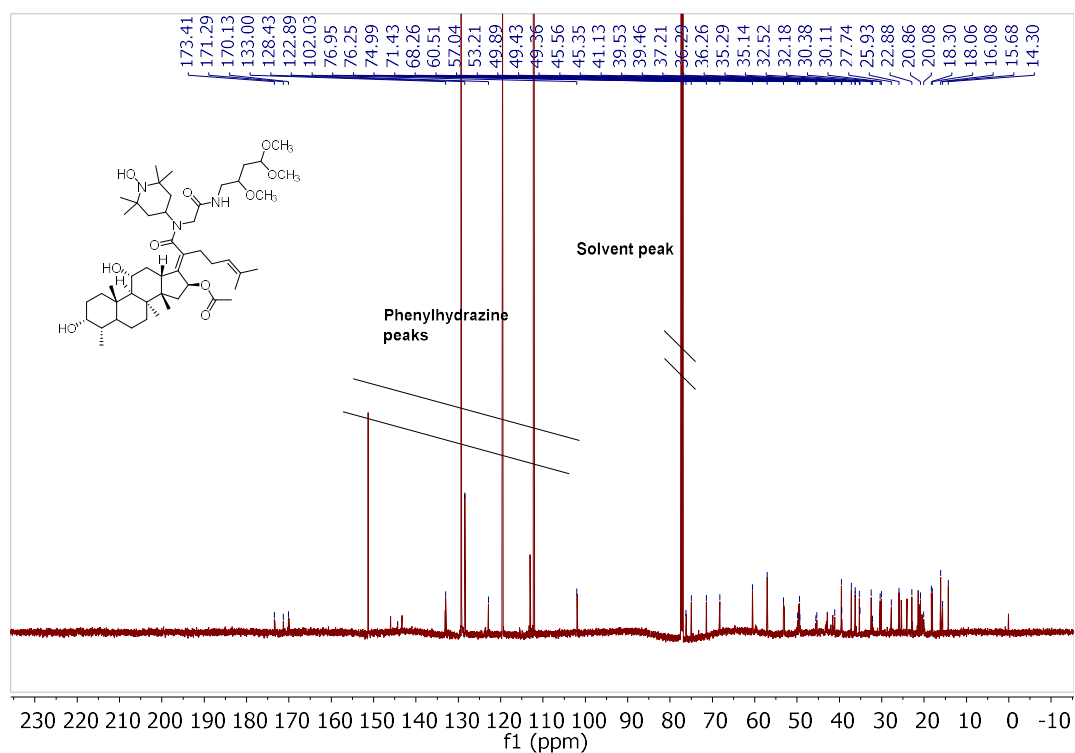

**Figure S12.**  $^{13}\text{C}$  NMR (151 MHz,  $\text{CDCl}_3$ ) spectrum of compound **9**.



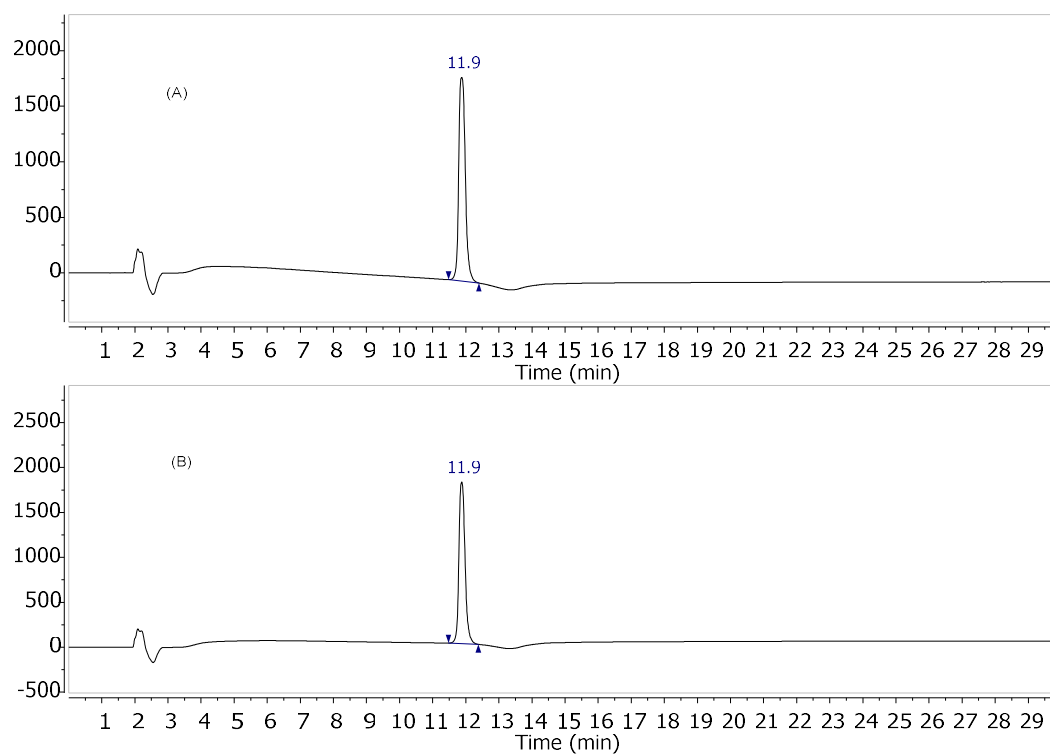

**Figure S13.** RP-HPLC chromatogram of compound **9** a) 210 nm, b) 215 nm.

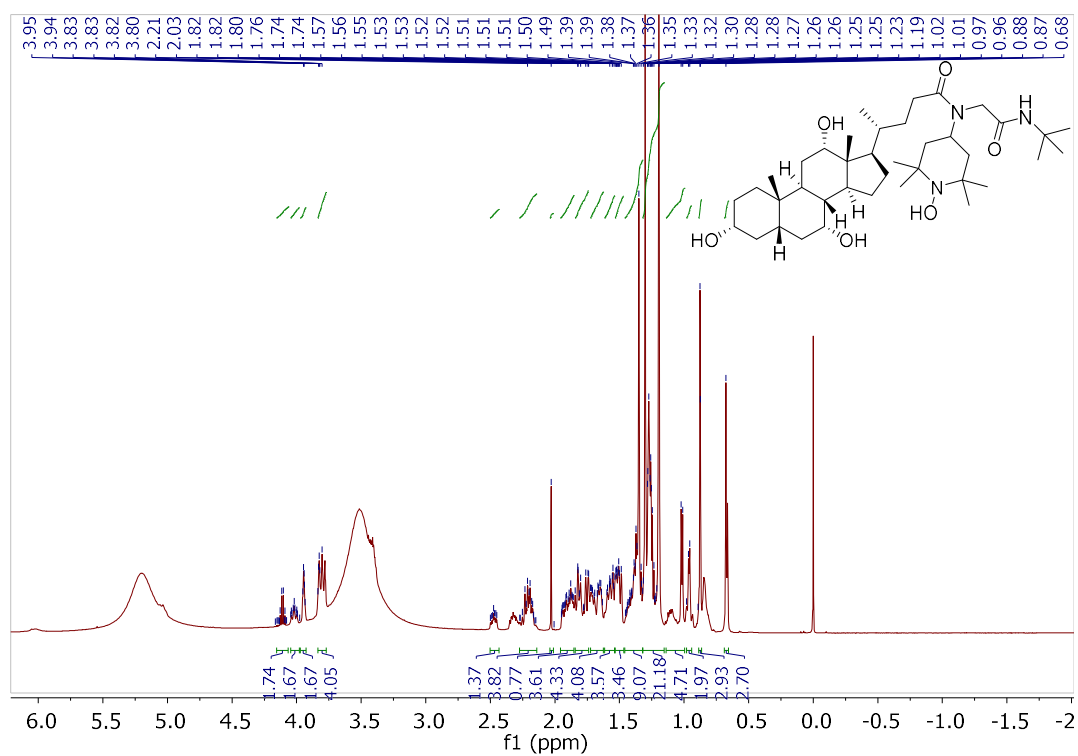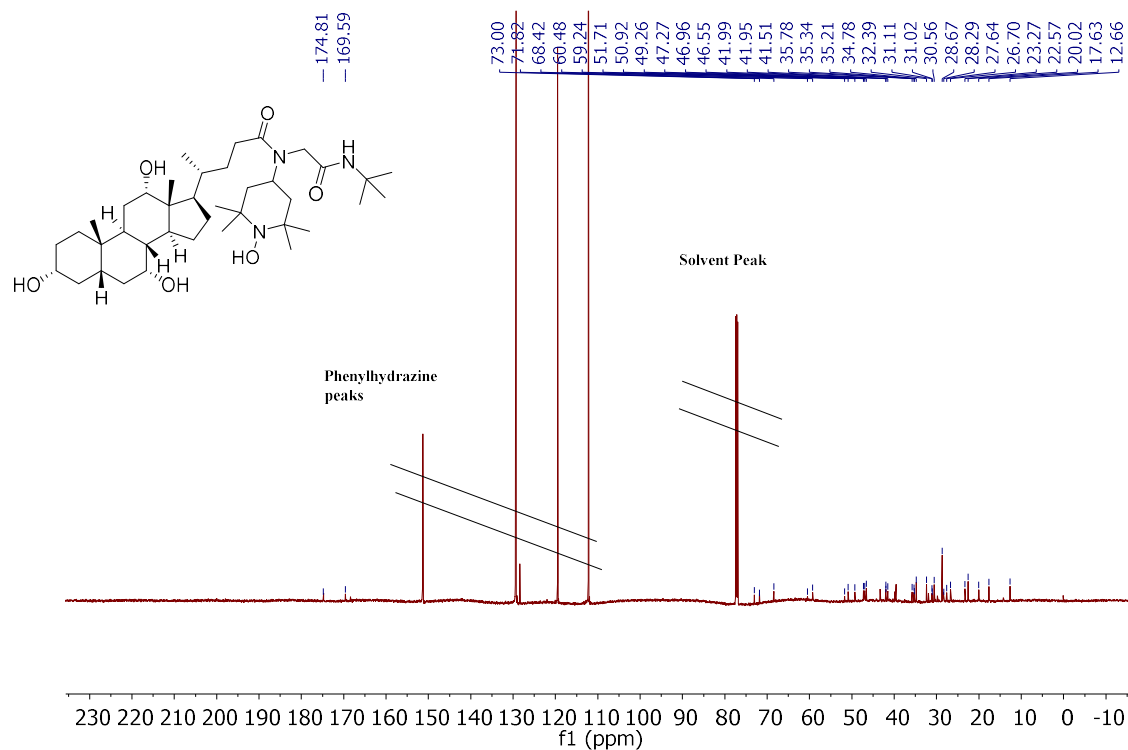

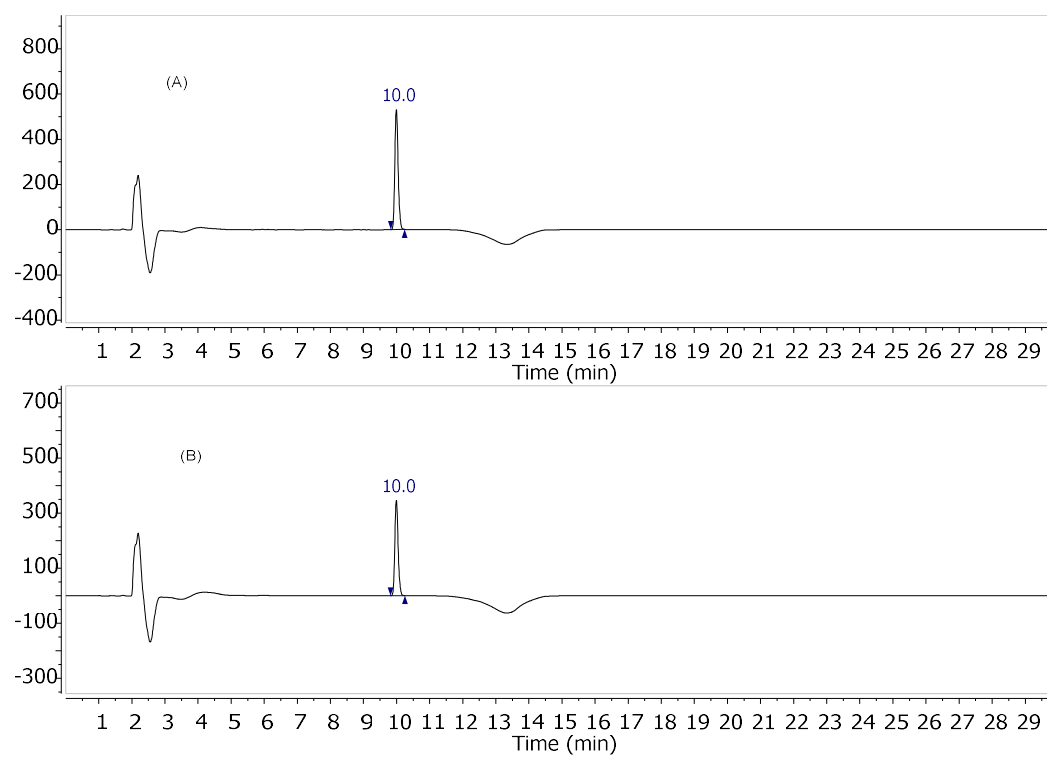

**Figure S16.** RP-HPLC chromatogram of compound **10** a) 210 nm, b) 215 nm.

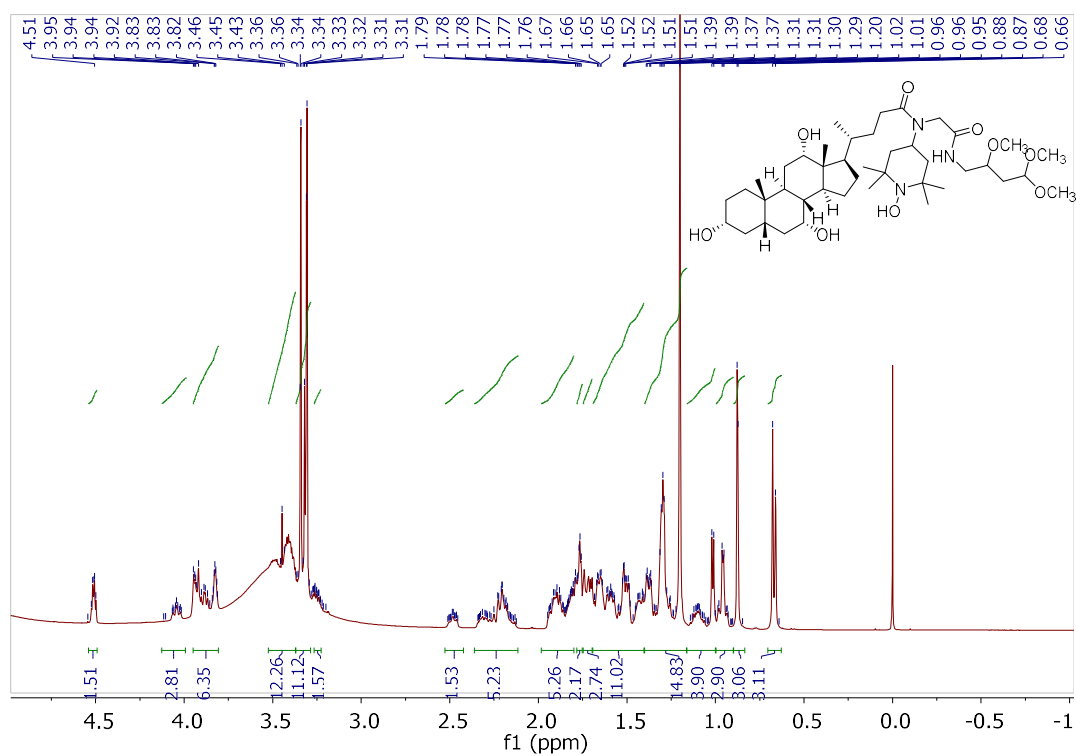

**Figure S17.** <sup>13</sup>C NMR (151 MHz, CDCl<sub>3</sub>) spectrum of compound **11**.

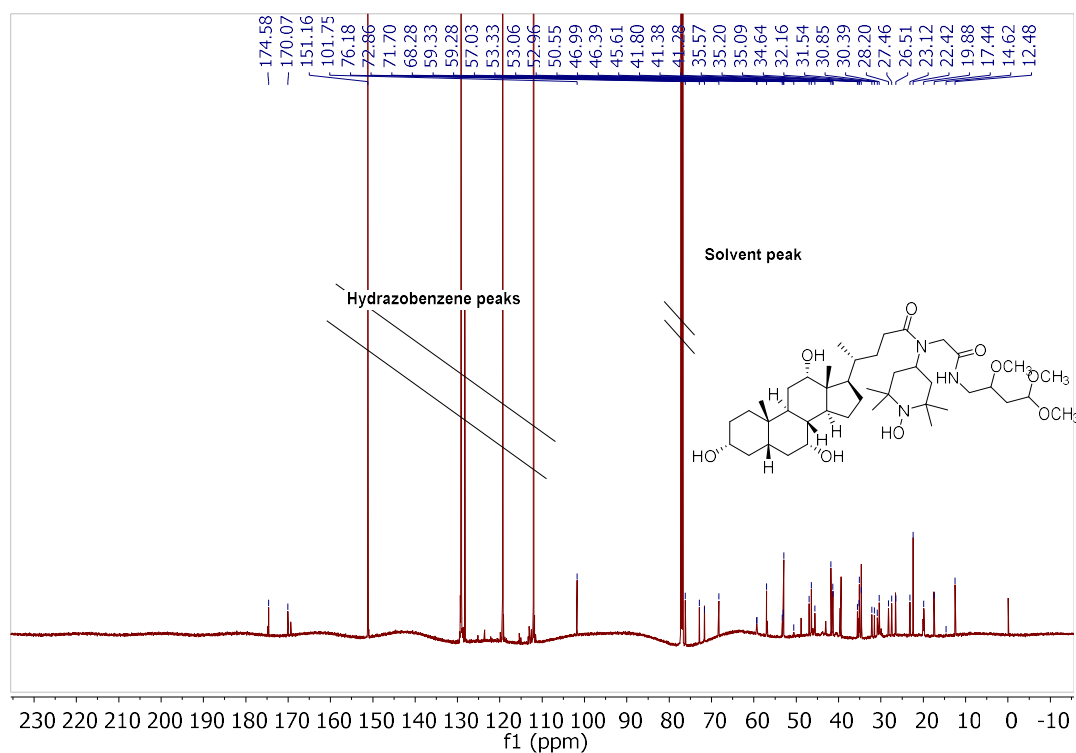

**Figure S18.** <sup>13</sup>C NMR (151 MHz, CDCl<sub>3</sub>) spectrum of compound **11**.

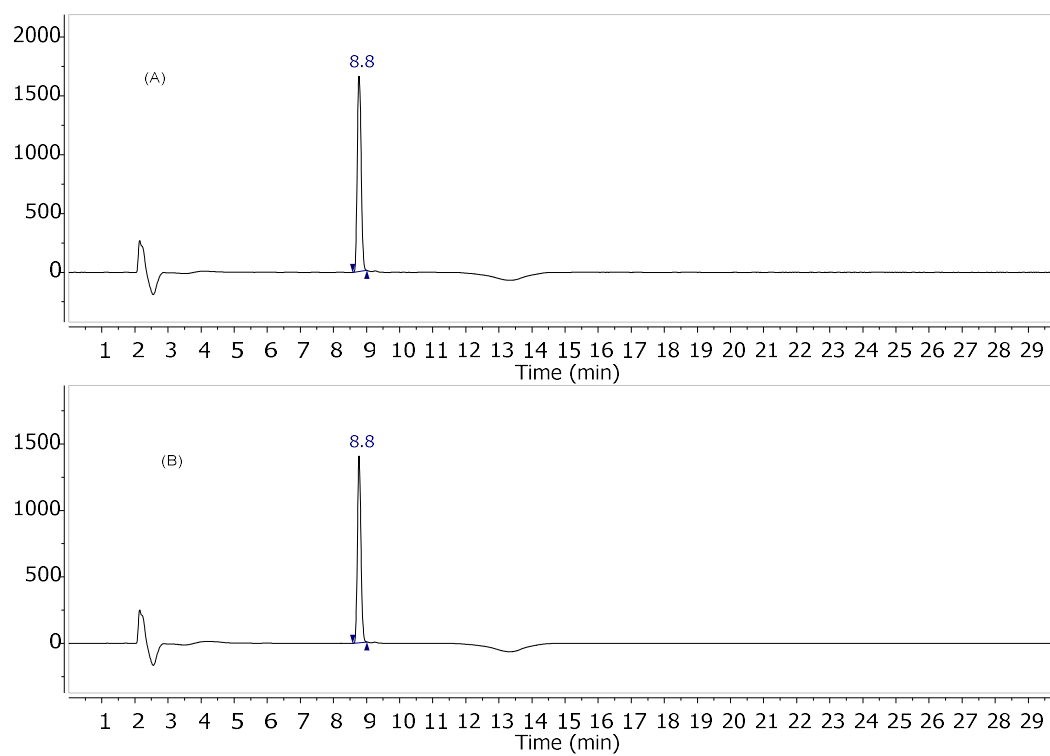

**Figure S19.** RP-HPLC chromatogram of compound **11** a) 210 nm, b) 215 nm.

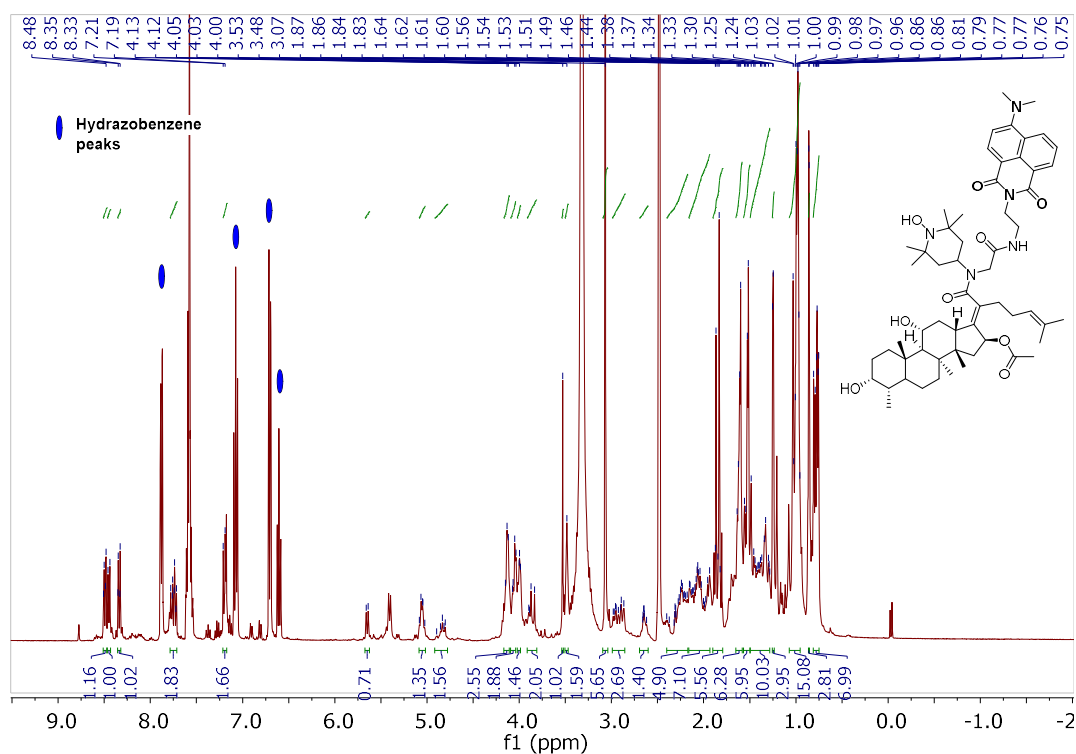

**Figure S20.**  $^1\text{H}$  NMR (400 MHz,  $\text{DMSO}-d_6$ ) spectrum of compound **12**.

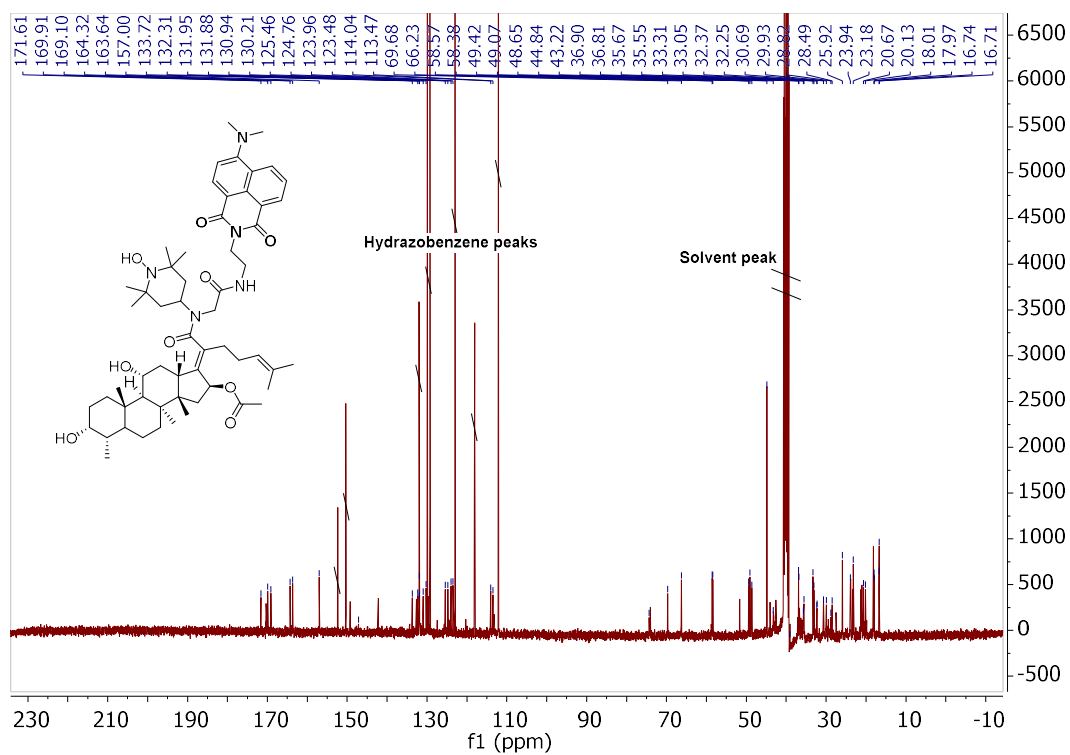

**Figure S21.**  $^{13}\text{C}$  NMR (101 MHz,  $\text{DMSO}-d_6$ ) spectrum of compound **12**.

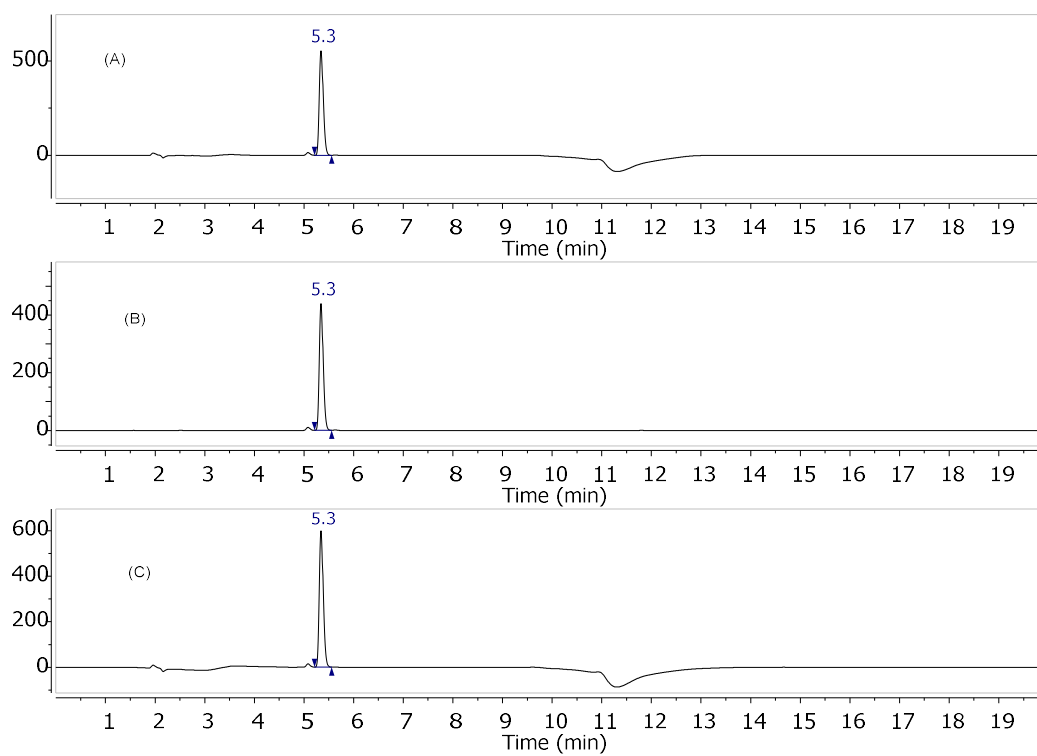

**Figure S22.** RP-HPLC chromatogram of compound **12** a) 210 nm, b) 215 nm, c) 254 nm.

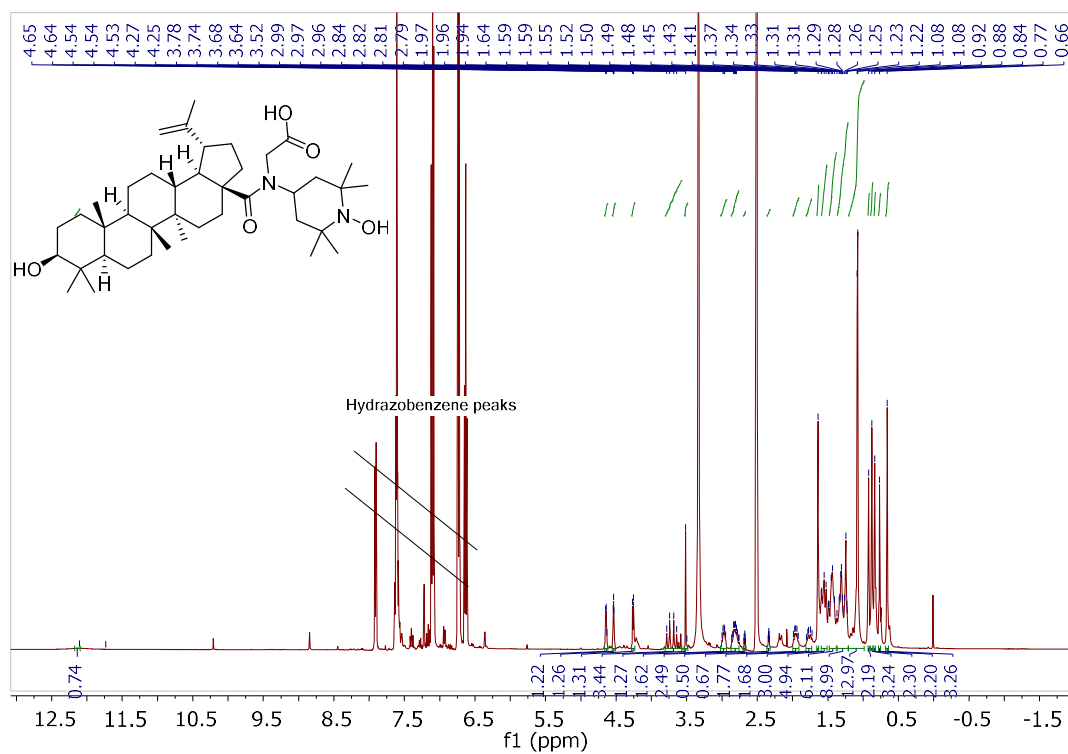

**Figure S23.** <sup>1</sup>H NMR (400 MHz, DMSO-*d*<sub>6</sub>) spectrum of compound **14**.

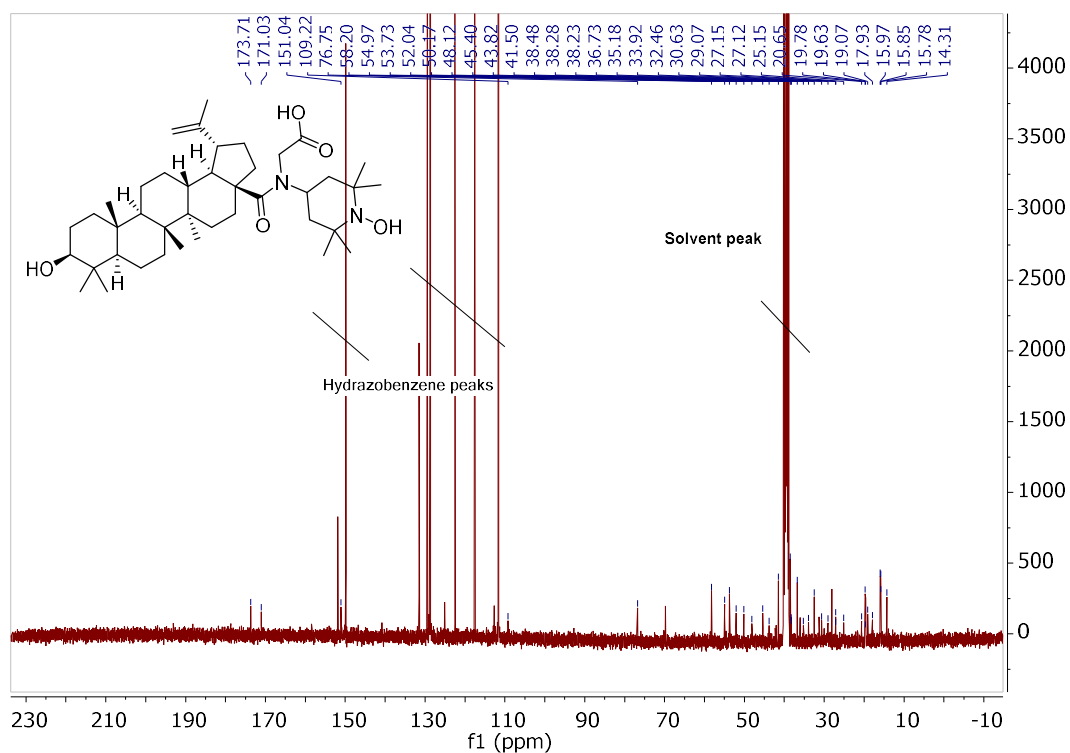

**Figure S24.** <sup>13</sup>C NMR (101 MHz, DMSO-*d*<sub>6</sub>) spectrum of compound **14**.



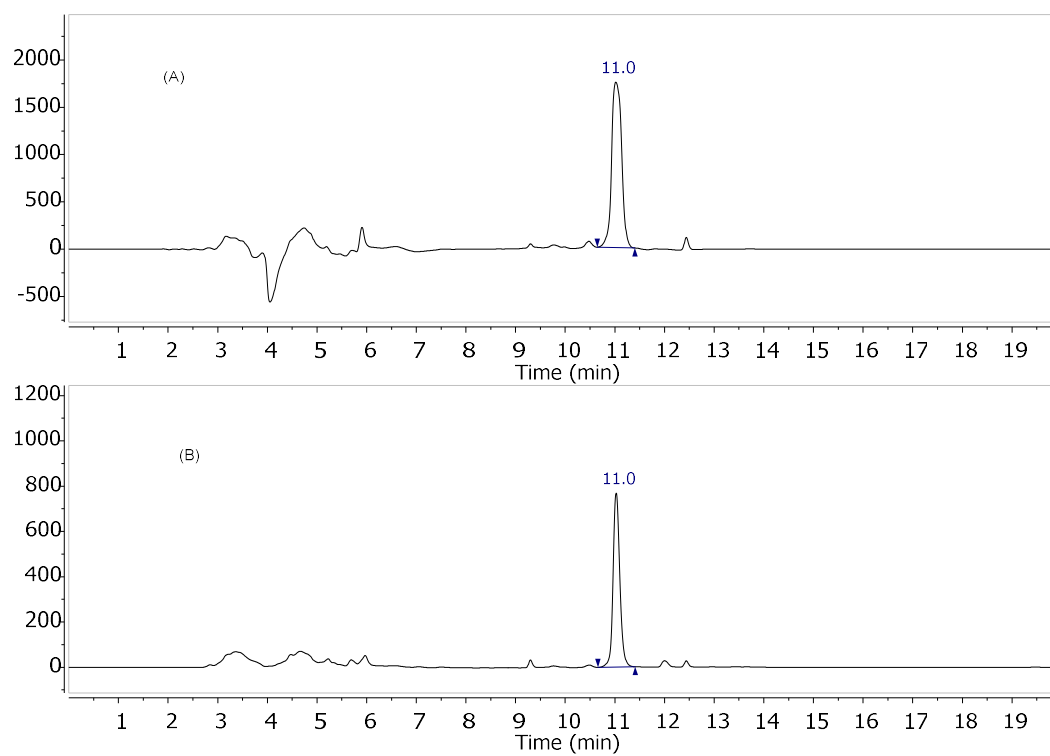

**Figure S25.** RP-HPLC chromatogram of compound **14** a) 210 nm, b) 215 nm.

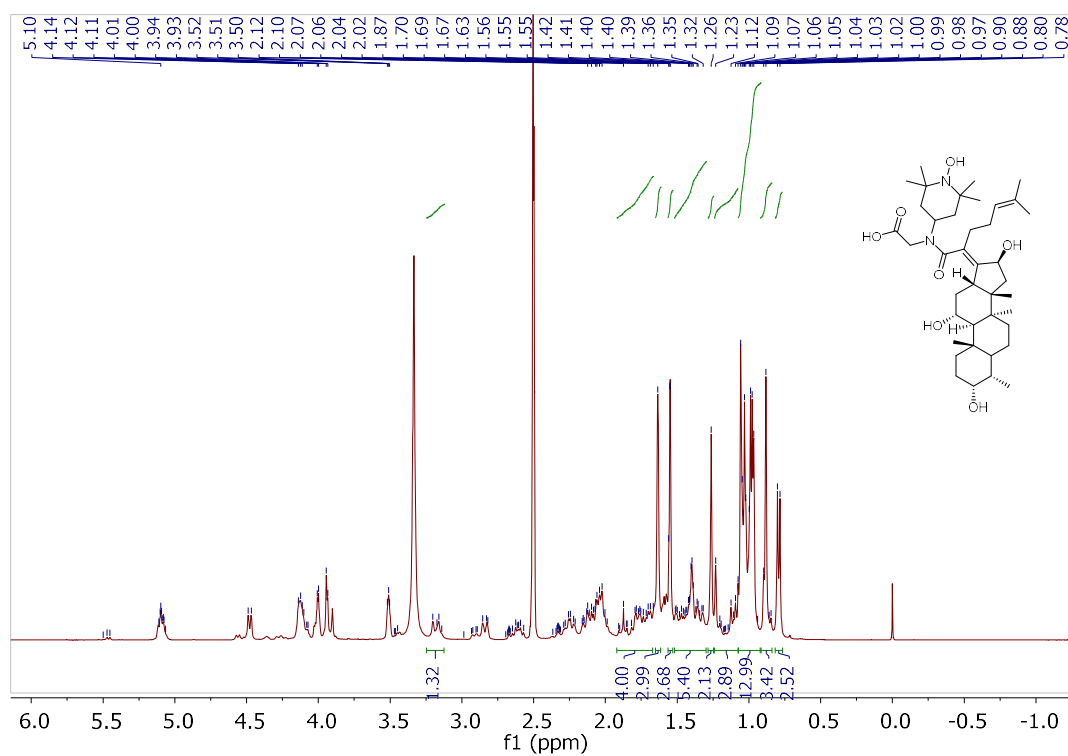

**Figure S26.**  $^1\text{H}$  NMR (400 MHz,  $\text{DMSO}-d_6$ ) spectrum of compound **16**.

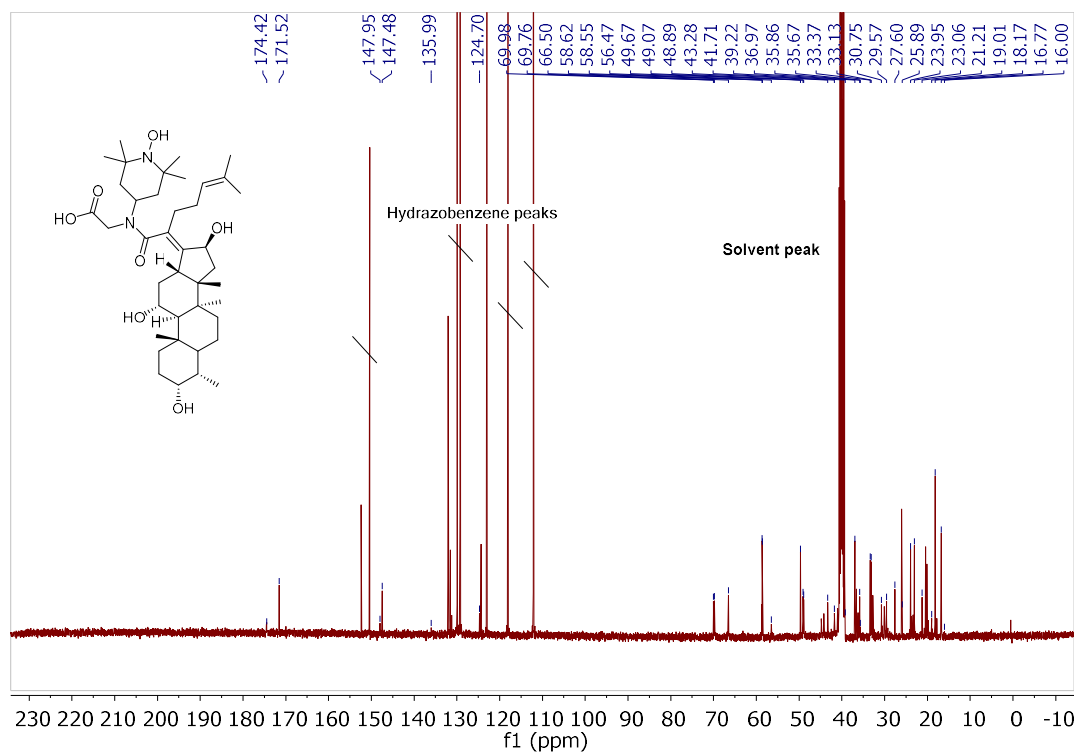

**Figure S27.**  $^{13}\text{C}$  NMR (101 MHz,  $\text{DMSO}-d_6$ ) spectrum of compound **16**.

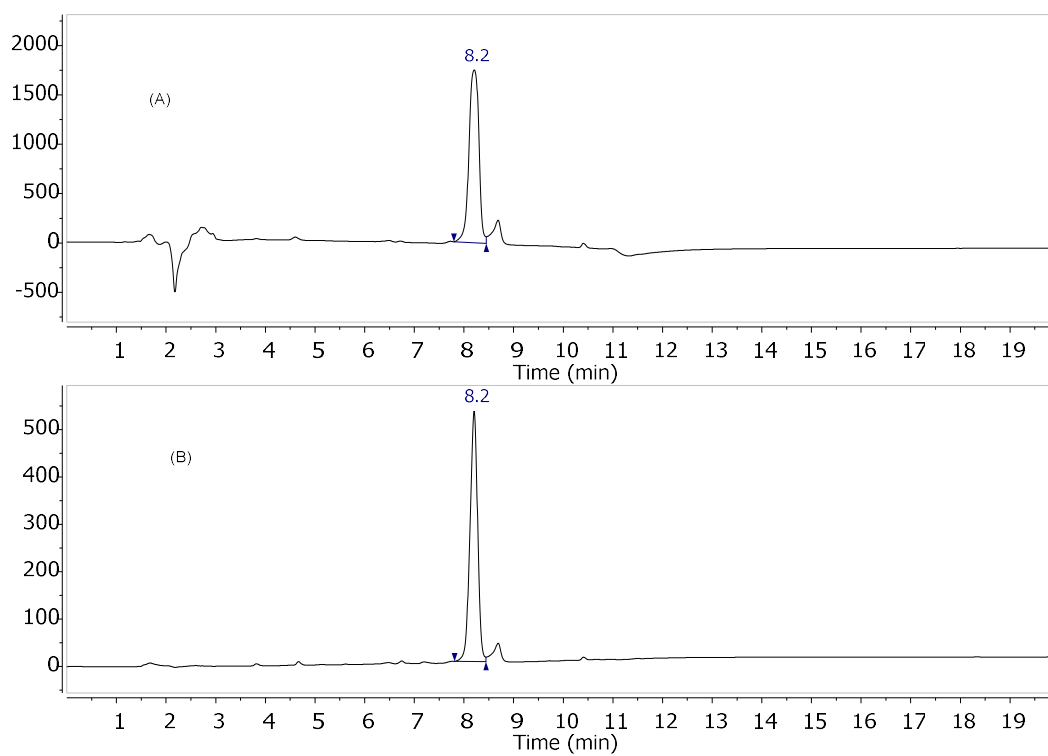

**Figure S28.** RP-HPLC chromatogram of compound **16** a) 210 nm, b) 215 nm.

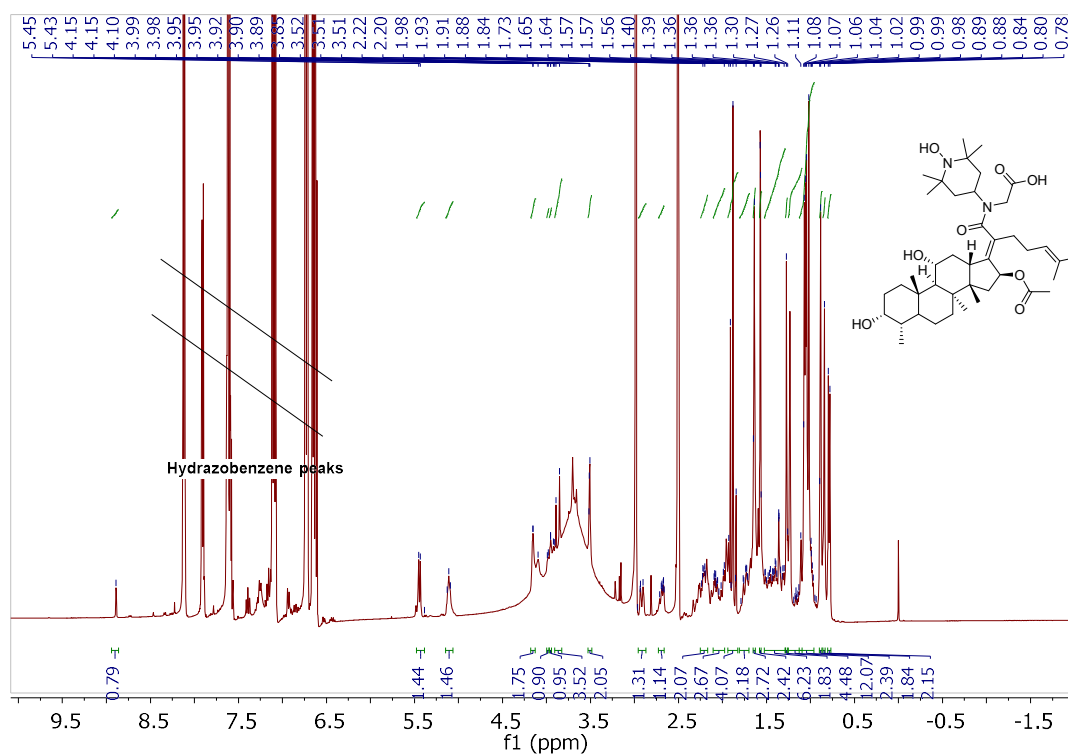

**Figure S29.**  $^1\text{H}$  NMR (400 MHz,  $\text{DMSO}-d_6$ ) spectrum of compound **17**.

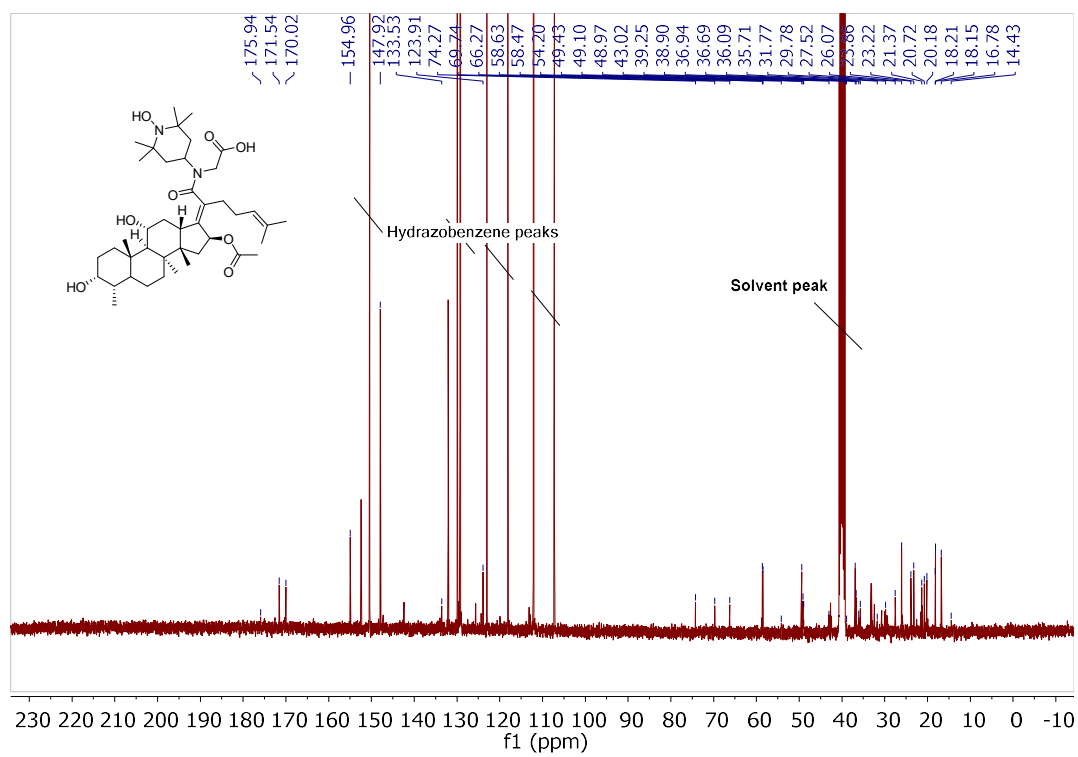

**Figure S30.**  $^{13}\text{C}$  NMR (101 MHz,  $\text{DMSO}-d_6$ ) spectrum of compound **17**.

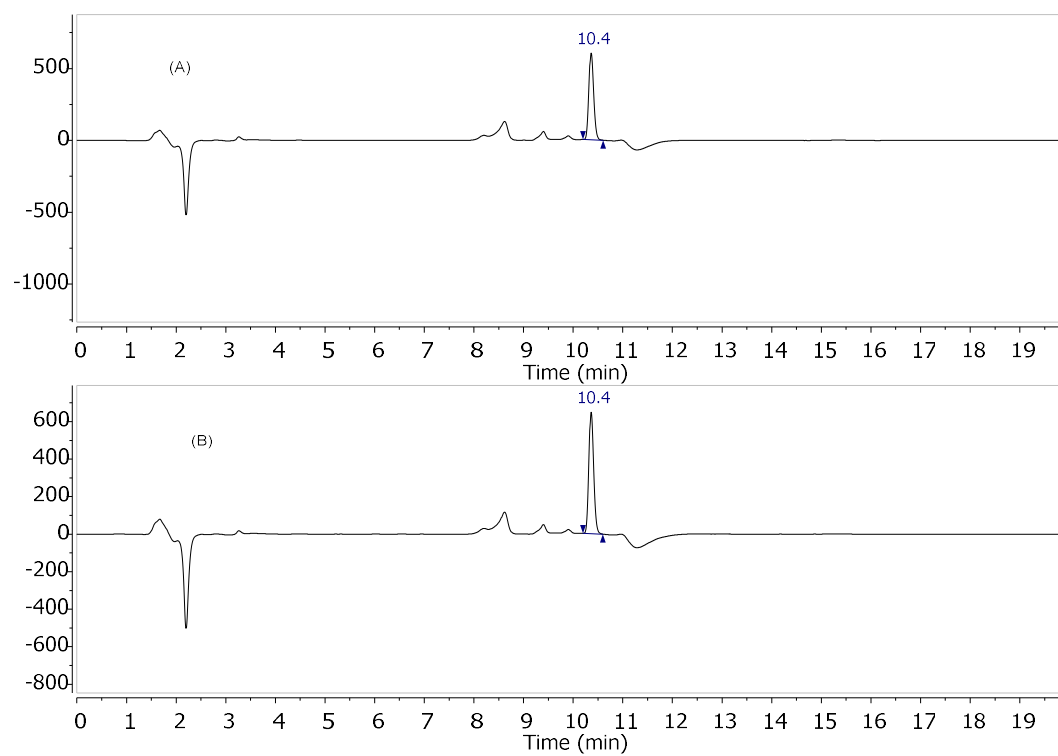

**Figure S31.** RP-HPLC chromatogram of compound **17** a) 210 nm, b) 215 nm.

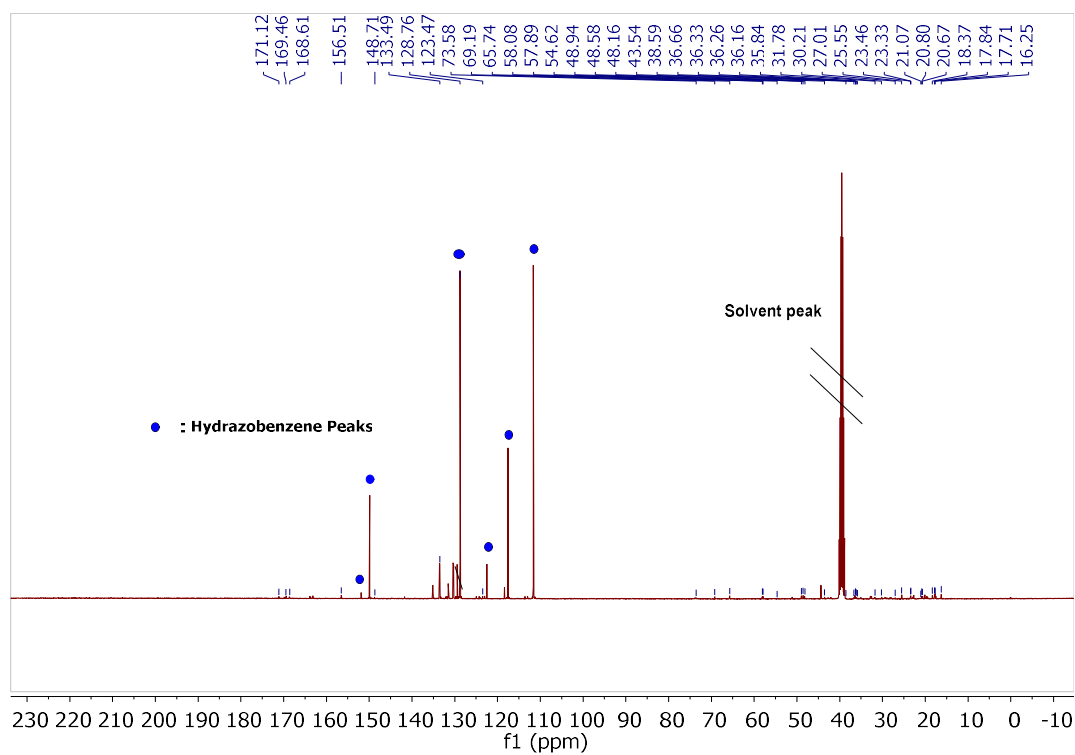

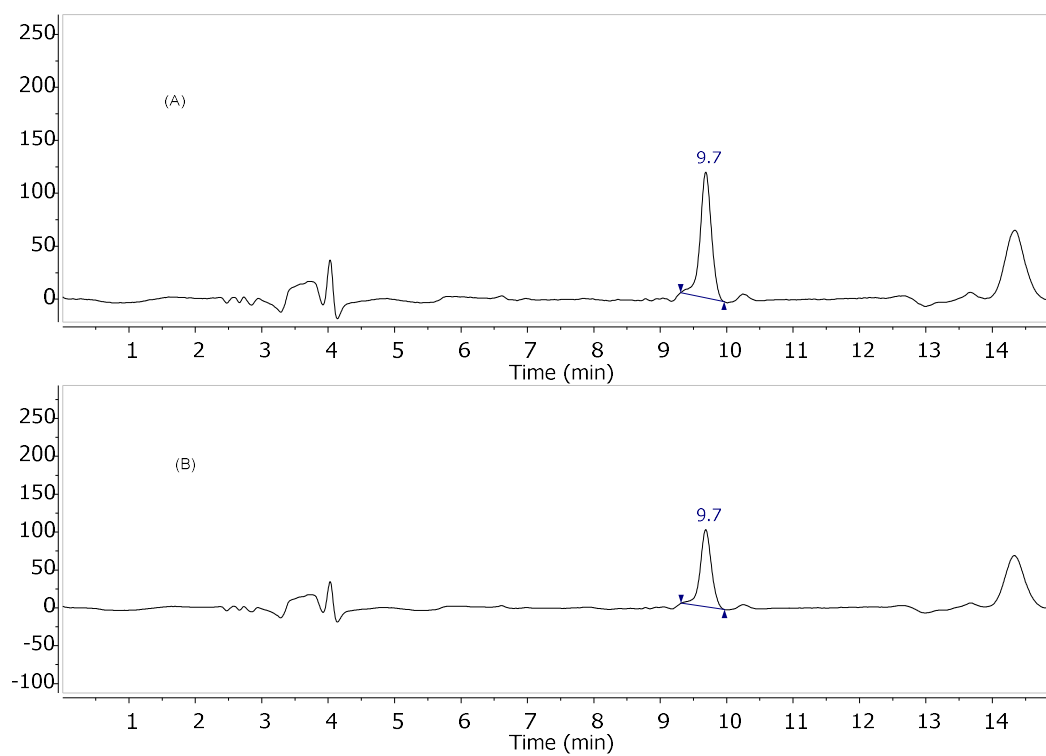

**Figure S34.** RP-HPLC chromatogram of compound **18** a) 210 nm, b) 215 nm.
